# Supplementary material
Source: PubMed Central journal article supplement (PMC4571784)
Supplement: supp_the2014-0468_Supplemental_Tables.pdf [file supp_the2014-0468_Supplemental_Tables.pdf]

Supplemental Tables for:  
Clinical Activity of Ipilimumab in Acral Melanoma: A Retrospective Review  
Douglas Johnson et al.

**Table S1:** Mutations assessed at VICC<sup>1</sup>

| <b>Gene</b>   | <b>Amino acid substitution</b> | <b>Nucleotide substitution</b> |
|---------------|--------------------------------|--------------------------------|
| <b>BRAF</b>   | V600E                          | c.1799T>A                      |
|               | V600K                          | c.1798_1799GT>AA               |
|               | V600M                          | c.1798G>A                      |
|               | V600D                          | c.1799_1800TG>AT               |
|               | V600R                          | c.1798_1799GT>AG               |
|               | V600G                          | c.1799T>G                      |
|               | V600E'                         | c.1799_1800TG>AA               |
| <b>NRAS</b>   | G12S                           | c.34G>A                        |
|               | G12C                           | c.34G>T                        |
|               | G12R                           | c.34G>C                        |
|               | G12V                           | c.35G>A                        |
|               | G12A                           | c.35G>C                        |
|               | G12D                           | c.35G>A                        |
|               | G13A                           | c.38G>C                        |
|               | G13V                           | c.38G>T                        |
|               | G13R                           | c.37G>C                        |
|               | G13C                           | c.37G>T                        |
|               | G13S                           | c.37G>A                        |
|               | G13D                           | c.38G>A                        |
|               | Q61E                           | c.181C>G                       |
|               | Q61H                           | c.183A>T                       |
|               | Q61H                           | c.183A>C                       |
|               | Q61L                           | c.182A>T                       |
|               | Q61L                           | c.182_183AA>TG                 |
|               | Q61K                           | c.181C>A                       |
|               | Q61P                           | c.182A>C                       |
|               | Q61R                           | c.182A>G                       |
| Q61R          | c.182_183AA>GG                 |                                |
| <b>CKIT</b>   | W557R                          | c.1669T>C                      |
|               | V559A                          | c.1669T>C                      |
|               | V559D                          | c.1669T>A                      |
|               | L576P                          | c.1727T>C                      |
|               | K642E                          | c.1924A>G                      |
|               | D816H                          | c.2446G>C                      |
| <b>GNA11</b>  | Q209P                          | c.626A>C                       |
|               | Q209L                          | c.626A>T                       |
| <b>GNAQ</b>   | Q209P                          | c.626A>C                       |
|               | Q209L                          | c.626A>T                       |
|               | Q209R                          | c.626A>G                       |
| <b>CTNNB1</b> | S37F                           | c.110C>T                       |

|      |          |
|------|----------|
| S37Y | c.110C>A |
| S45P | c.133T>C |
| S45F | c.134C>T |
| S45Y | c.134C>A |

<sup>1</sup>Mutations assessed by SNaPshot testing, melanoma specific panel

**Table S2:** Mutations assessed at MSKCC<sup>1</sup>

| Gene        | Amino acid substitution | Nucleotide substitution | Gene        | Amino acid substitution | Nucleotide substitution |                |
|-------------|-------------------------|-------------------------|-------------|-------------------------|-------------------------|----------------|
| <b>BRAF</b> | V600E                   | c.1799T>A               | <b>KRAS</b> | G12S                    | c.34G>A                 |                |
|             | V600M                   | c.1798G>A               |             | G12R                    | c.34G>C                 |                |
|             | V600A                   | c.1799_T>C              |             | G12C                    | c.34G>T                 |                |
|             | V600G                   | c.1799T>G               |             | G12D                    | c.35G>A                 |                |
|             | G469A                   | c.1406G>C               |             | G12A                    | c.35G>C                 |                |
|             | G469E                   | c.1406G>A               |             | G12V                    | c.35G>T                 |                |
|             | G469V                   | c.1406G>T               |             | G13S                    | c.37G>A                 |                |
|             | D594G                   | c.1781A>G               |             | G13R                    | c.37G>C                 |                |
|             | D594V                   | c.1781A>T               |             | G13C                    | c.37G>T                 |                |
|             | <b>NRAS</b>             | G12S                    |             | c.34G>A                 | G13D                    | c.38G>A        |
|             |                         | G12C                    |             | c.34G>T                 | G13A                    | c.38G>C        |
|             |                         | G12R                    |             | c.34G>C                 | G13V                    | c.38G>T        |
|             |                         | G12V                    |             | c.35G>A                 | Q61K                    | c.180-181TC>CA |
|             |                         | G12A                    |             | c.35G>C                 | Q61E                    | c.181C>G       |
| G12D        |                         | c.35G>A                 | Q61K        | c.181C>A                |                         |                |
| G13A        |                         | c.38G>C                 | Q61R        | c.182A>G                |                         |                |
| G13V        |                         | c.38G>T                 | Q61L        | c.182A>T                |                         |                |
| G13R        |                         | c.37G>C                 | Q61P        | c.182A>C                |                         |                |
| G13C        |                         | c.37G>T                 | Q61H        | c.183A>C                |                         |                |
| G13S        |                         | c.37G>A                 | Q61H        | c.183A>T                |                         |                |
| G13D        |                         | c.38G>A                 | K117N       | c351A>C                 |                         |                |
| Q61E        |                         | c.181C>G                | K117N       | c351A>T                 |                         |                |

|               |        |           |              |       |                    |
|---------------|--------|-----------|--------------|-------|--------------------|
|               | Q61H   | c.183A>T  |              | A146P | c.436G>C           |
|               | Q61H   | c.183A>C  |              | A146T | c.436G>A           |
|               | Q61L   | c.182A>T  | <b>ERBB2</b> | L755S | c.2264T>C          |
|               | Q61K   | c.181C>A  |              | D769H | c.2305G>C          |
|               | Q61P   | c.182A>C  |              | V777L | c.2329G>T          |
|               | Q61R   | c.182A>G  |              | V777M | c.2329G>A          |
|               | Q61Q   | c.183A>G  | <b>EGFR</b>  | E709K | c.2125G>A          |
| <b>PIK3CA</b> | R88Q   | c.263G>A  |              | E709H | c.2125_2127GAA>CAT |
|               | N345K  | c.1035T>G |              | E709A | c.2126A>C          |
|               | N345K  | c.1035T>A |              | E709G | c.2126A>G          |
|               | C420R  | c.1258T>C |              | E709V | c.2126A>T          |
|               | E542K  | c.1624G>A |              | G719C | c.2155G>T          |
|               | E542Q  | c.1624G>C |              | G719S | c.2155G>A          |
|               | E545K  | c.1633G>A |              | G719A | c.2156G>C          |
|               | E545Q  | c.1633G>C |              | G719D | c.2156G>A          |
|               | E545A  | c.1634A>C |              | D761Y | c.2281G>T          |
|               | E545G  | c.1634A>G |              | D761N | c.2281G>A          |
|               | E545D  | c.1635G>T |              | S768I | c.2303G>T          |
|               | M1043I | c.3129G>T |              | R776C | c.2326C>T          |
|               | H1047Y | c.3139C>T |              | R776H | c.2327G>A          |
|               | H1047L | c.3140A>T |              | T790M | c.2369C>T          |
|               | H1047R | c.3140A>G |              | T854A | c.2560A>G          |
| <b>MEK1</b>   | p.Q56P | c.167A>C  |              | L858M | c.2572C>A          |
|               | p.K57N | c.171G>T  |              | L858R | c.2573T>G          |
|               | p.D67N | c.199G>A  |              | L861Q | c.2582T>A          |
| <b>AKT</b>    | p.E17K | c.49G>A   |              | L861R | c.2582T>G          |

<sup>1</sup>Mutations assessed by Sequenome, cancer-specific panel
